# Supplementary material for: Antioxidant Mechanisms of Echinatin and Licochalcone A
Source: MDPI journal article supplement (doi:10.3390/molecules24010003), 2018-12-20
Supplement: s1 [file s1]

Suppl. 2 Phenolics with 1,1-dimethyl-2-propeny substitute

## Antioxidant Mechanisms of Echinatin and Licochalcone A

Minshi Liang<sup>1,2,†</sup>, Xican Li<sup>1,2,†,\*</sup>, Xiaojian Ouyang<sup>1,2</sup>, Hong Xie<sup>1,2</sup>, and Dongfeng Chen<sup>3,4,\*</sup>

<sup>1</sup> School of Chinese Herbal Medicine; Guangzhou University of Chinese Medicine, Guangzhou 510006, China. E-mails: lminshi@outlook.com (M.L.); [oyxiaojian55@163.com](mailto:oyxiaojian55@163.com) (X.O.); xiehongxh1@163.com (H.X.)

<sup>2</sup> Innovative Research & Development Laboratory of TCM; Guangzhou University of Chinese Medicine, Guangzhou 510006, China.

<sup>3</sup> School of Basic Medical Science, Guangzhou University of Chinese Medicine, Guangzhou, China, 510006

<sup>4</sup> The Research Center of Basic Integrative Medicine, Guangzhou University of Chinese Medicine, Guangzhou, China, 510006. E-mail: chen888@gzucm.edu.cn (D. C.)

\* Correspondence: [lixc@gzucm.edu.cn](mailto:lixc@gzucm.edu.cn) (X.L.); [lixican@126.com](mailto:lixican@126.com) (X.L.); chen888@gzucm.edu.cn (D. C.) Tel: +86-20-39358076; Fax: +86-20-38892690

† These authors contributed equally to this work.

| No. | Name                                                                                                                                      | Structure                                                                            | Plant                                      | Type     |
|-----|-------------------------------------------------------------------------------------------------------------------------------------------|--------------------------------------------------------------------------------------|--------------------------------------------|----------|
| 1   | Isocudraniazanthone A                                                                                                                     | 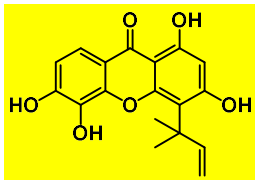   | Garcinia mangostana Linn[1]                | xanthone |
| 2   | 5,9,11-trihydroxy-10-(2''-hydroxy-3''-methylbut-3''-en-1-yl)-2,2-dimethyl-3-(2'-methylbut-3'-en-2'-yl)-2H,12H-pyrano[2,3-a]xanthen-12-one |  | The stem bark of Calophyllum pseudomole[2] | xanthone |

|   |                                                                                        |                                                                                    |                                                                     |          |
|---|----------------------------------------------------------------------------------------|------------------------------------------------------------------------------------|---------------------------------------------------------------------|----------|
| 3 | allanxanthone A                                                                        | 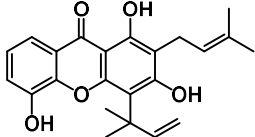  | the stem bark of <i>Allanblackia floribunda</i> [3]                 | xanthone |
| 4 | 4-(1,1-dimethylprop-2-enyl)-1,3,5,8-tetrahydroxyxanthone                               |   | <i>Garcinia cantleyana</i> [4, 5]                                   | xanthone |
| 5 | 1,3,5-trihydroxy-6,6'-dimethyl-pyrano(2',3':6,7)-4-(1,1-dimethyl-prop-2-enyl)xanthone  |   | <i>C. inophyllum</i> , <i>G. opaca</i> and <i>G. bancana</i> [6, 7] | xanthone |
| 6 | macluraxanthone                                                                        |   | <i>C. inophyllum</i> , <i>G. opaca</i> and <i>G. bancana</i> [6, 7] | xanthone |
| 7 | 1,3,6,7-tetrahydroxy-2-(3-methylbut-2-enyl)-8-(2-methylbut-3-en-2-yl)-9H-xanthen-9-one |  | <i>Cundrania tricuspidata</i> [8]                                   | xanthone |

|    |                                                                                  |                                                                                    |                              |          |
|----|----------------------------------------------------------------------------------|------------------------------------------------------------------------------------|------------------------------|----------|
| 8  | Macluraxanthone B                                                                | 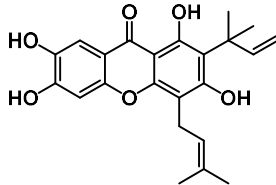  | Cundrania tricuspidata[8, 9] | xanthone |
| 9  | Cudraxanthone L                                                                  |   | Cundrania tricuspidata[8, 9] | xanthone |
| 10 | 1,3,7-trihydroxy-4-(1,1-dimethyl-2-propenyl)-5,6-(2-2-dimethylchromeno) xanthone |   | Cundrania tricuspidata[8]    | xanthone |
| 11 | Cudraticusxanthone F                                                             |  | Cundrania tricuspidata[8]    | xanthone |

|    |                                                                                        |                                                                                     |                               |          |
|----|----------------------------------------------------------------------------------------|-------------------------------------------------------------------------------------|-------------------------------|----------|
| 12 | Cudraticusxanthone A                                                                   | 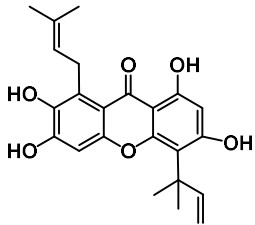   | Cudrania tricuspidata[8]      | xanthone |
| 13 | 2,3,6,8-tetrahydroxy-1-(3-methylbut-2-enyl)-5-(2-methylbut-3-en-2-yl)-9H-xanthen-9-one |    | Cudrania tricuspidata[9]      | xanthone |
| 14 | penangianaxanthone                                                                     |    | Garcinia penangiana Pierre[5] | xanthone |
| 15 | cudraticusxanthone H                                                                   |   | Garcinia penangiana Pierre[5] | xanthone |
| 16 | macluraxanthone C                                                                      |  | Garcinia penangiana Pierre[5] | xanthone |

|    |                                                                                                           |                                                                                     |                                      |                |
|----|-----------------------------------------------------------------------------------------------------------|-------------------------------------------------------------------------------------|--------------------------------------|----------------|
| 17 | banganxanthone C                                                                                          | 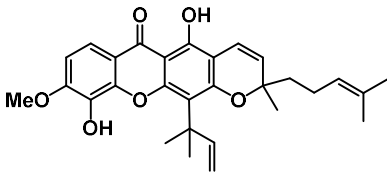  | the Leaves of Garcinia polyantha[10] | xanthone       |
| 18 | 1,2-dihydro-3,6,8-trihydroxy-1,1-bis (3-methylbut -2-enyl)-5-(1, 1-dimethylprop-2-enyl)-xanthen-2,9-dione |    | Hypericum Erectum[11]                | xanthone       |
| 19 | 6,8-dihydroxy-2,7-dimethoxy-3-(1,1-dimethylprop-2-enyl)-1,4-naphthoquinone                                |    | Lysionotus pauciflorus[12]           | naphthoquinone |
| 20 | 2-(1,1-dimethylprop-2-enyl)-3-hydroxy-1,4 naphthoquinone                                                  |   | Calceolaria andina L.[13]            |                |
| 21 | 5,7,4'-trihydroxy-8-(1,1-dimethylprop-2-enyl) isoflavone                                                  |  | Flemingia paniculata[14]             | Isoflavone     |

|    |                                                               |                                                                                   |                                                                |            |
|----|---------------------------------------------------------------|-----------------------------------------------------------------------------------|----------------------------------------------------------------|------------|
| 22 | 5,7,2',4'-tetrahydroxy-8-(1,1-dimethylprop-2-enyl)-isoflavone | 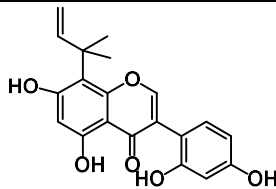 | Flemingia paniculata[14]                                       |            |
| 23 | glycyuralin B                                                 |  | the roots and rhizomes of Glycyrrhiza uralensis (licorice)[15] | isoflavane |

- [1] Martinez, A.; Hernandez-Marin, E.; Galano, A. Xanthoness as antioxidants: a theoretical study on the thermodynamics and kinetics of the single electron transfer mechanism. *Food Funct.* **2012**, 3, 442-450.
- [2] Tanjung, M.; Saputri, R.D.; Tjahjandarie, T.S. 5,9,11-Trihydroxy-10-(2''-hydroxy-3''-methylbut-3''-en-1-yl)-2,2-dimethyl-3-(2'-methylbut-3'-en-2'-yl)-2H,12H-pyrano[2,3-a]xanthen-12-one from Calophyllum pseudomole. *Molbank.* **2017**, 2017, M961.
- [3] Nkengfack, A.E.; Azebaze, G.A.; Vardamides, J.C.; Fomum, Z.T.; van Heerden, F.R. A prenylated xanthone from Allanblackia floribunda. *Phytochemistry.* **2002**, 60, 381-384.
- [4] Shadid, K.A.; Shaari, K.; Abas, F.; Israf, D.A.; Hamzah, A.S.; Syakroni, N.; Saha, K.; Lajis, N.H. Cytotoxic caged-polyprenylated xanthonoids and a xanthone from Garcinia cantleyana. *Phytochemistry.* **2007**, 68, 2537-2544.
- [5] Jabit, M.L.; Khalid, R.; Abas, F.; Shaari, K.; Hui, L.S.; Stanslas, J.; Lajis, N.H. Cytotoxic xanthoness from Garcinia penangiana Pierre. *Z Naturforsch C.* **2007**, 62, 786-792.
- [6] Jantan, I.; Juriyati, J.; Warif, N.A. Inhibitory effects of xanthoness on platelet activating factor receptor binding in vitro. *J Ethnopharmacol.* **2001**, 75, 287-290.
- [7] Jantan, I.B.; Jalil, J.; Warif, N.M.A. Platelet Activating Factor (PAF) Antagonistic Activities of Compounds Isolated from Guttiferae Species. *Pharmaceutical Biology.* **2001**, 39, 243-246.
- [8] Seo, E.J.; Curtis-Long, M.J.; Lee, B.W.; Kim, H.Y.; Ryu, Y.B.; Jeong, T.S.; Lee, W.S.; Park, K.H. Xanthoness from Cudrania tricuspidata displaying potent alpha-

glucosidase inhibition. *Bioorg Med Chem Lett*. **2007**, 17, 6421-6424.

[9] Lee, B.W.; Gal, S.W.; Park, K.M.; Park, K.H. Cytotoxic xanthenes from *Cudrania tricuspidata*. *J Nat Prod*. **2005**, 68, 456-458.

[10] Lannang, A.M.; Tatsimo, S.J.; Fouotsa, H.; Dzoyem, J.P.; Saxena, A.K.; Sewald, N. Cytotoxic compounds from the leaves of *Garcinia polyantha*. *Chem Biodivers*. **2014**, 11, 975-981.

[11] Tian Ying, A.N.; Li Hong, H.U. A New Xanthone Derivative from *Hypericum Erectum*. *Chinese Chemical Letters*. **2002**, 13, 623-624.

[12] Zhong, Y.J.; Wen, Q.F.; Li, C.Y.; Su, X.H.; Yuan, Z.P.; Li, Y.F. Two New Naphthoquinone Derivatives from *Lysionotus pauciflorus*. *Helvetica Chimica Acta*. **2013**, 96, 1750-1756.

[13] Khambay, B.P.; Batty, D., .; Cahill, M., .; Denholm, I., .; Mead-Briggs, M., .; Vinall, S., .; Niemeyer, H.M.; Simmonds, M.S. Isolation, characterization, and biological activity of naphthoquinones from *Calceolaria andina* L. *Journal of Agricultural & Food Chemistry*. **1999**, 47, 770.

[14] Rahman, M.M.; Sarker, S.D.; Byres, M.; Gray, A.I. New salicylic acid and isoflavone derivatives from *Flemingia paniculata*. *J Nat Prod*. **2004**, 67, 402-406.

[15] Ji, S.; Li, Z.; Song, W.; Wang, Y.; Liang, W.; Li, K.; Tang, S.; Wang, Q.; Qiao, X.; Zhou, D. Bioactive Constituents of *Glycyrrhiza uralensis* (Licorice): Discovery of the Effective Components of a Traditional Herbal Medicine. *Journal of Natural Products*. **2017**, 79, 281.
