# Supplementary material for: Antioxidant Mechanisms of Echinatin and Licochalcone A
Source: MDPI journal article supplement (doi:10.3390/molecules24010003), 2018-12-20

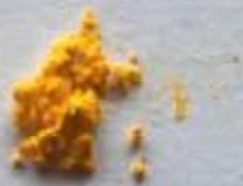

## CERTIFICATE OF ANALYSIS

**BBP No.:** BBP03989

**CAS No.:** 58749-22-7

**Chemical Name:** Licochalcone A

**Molecular Formula:** C<sub>21</sub>H<sub>22</sub>O<sub>4</sub>

**Structure:**

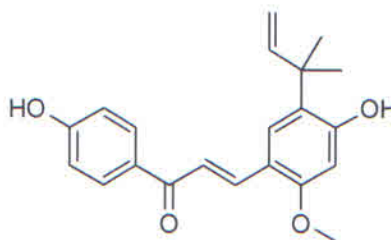

**Purity:** 98%

**Appearance:** Yellow powder

**Solvent:** Acetone, methanol

**Exact Weight:** 5.1 mg

**Storage:** Store in a dark place under the temperature of 0-4 °C

**Intended Use:** For laboratory use only

**Reference:** G. Yoon, Arch Pharm Res, 2007, 30(3), 313-316

**Warm Notice:** When publishing, please cite as: chemical name was purchased from BioBioPha Co., Ltd. (Kunming, China)

### Characterization Data Summary

| Analytical Test                           | Results                             |
|-------------------------------------------|-------------------------------------|
| Identification by <sup>1</sup> H-NMR      | Consistent with the above structure |
| Purity tested by HPLC, <sup>1</sup> H-NMR | 98%                                 |

**Authorized Signature:**

**Date:**

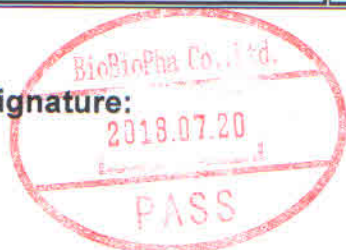

## PRODUCT QUALITY REPORT

Product Number: BBP03989

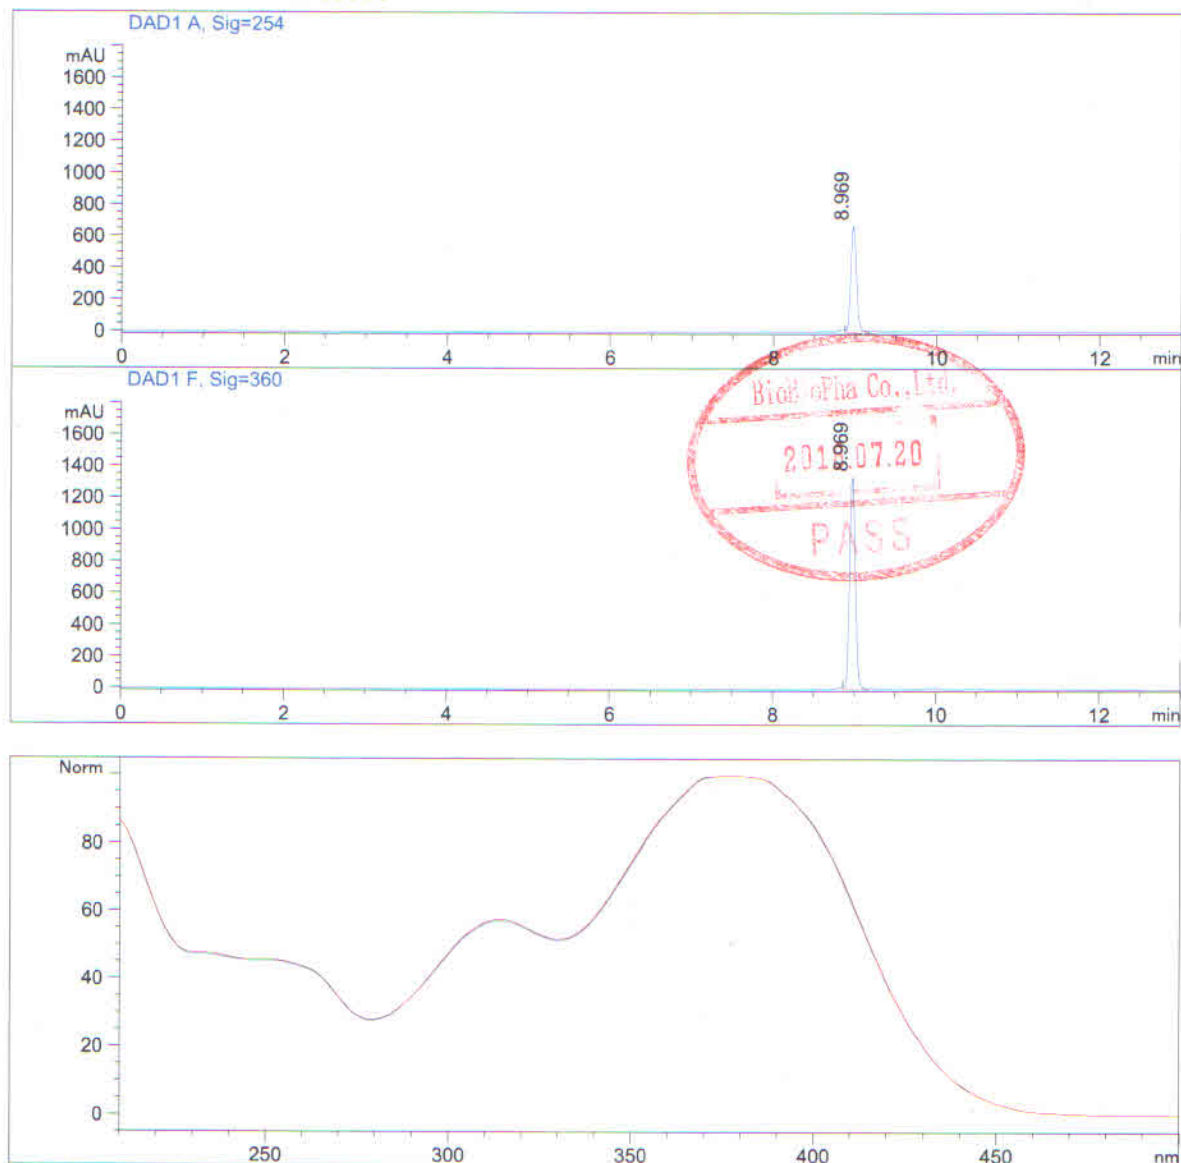

Agilent 1200 series HPLC system  
Extend-C18 column (5  $\mu$ m, 4.6  $\times$  150 mm)  
20% $\rightarrow$ 100% MeOH in H<sub>2</sub>O over 8.0 min followed by 100% MeOH to 13.0 min  
1.0 ml/min, 20°C

Acetone-d<sub>6</sub>, 400 MHz

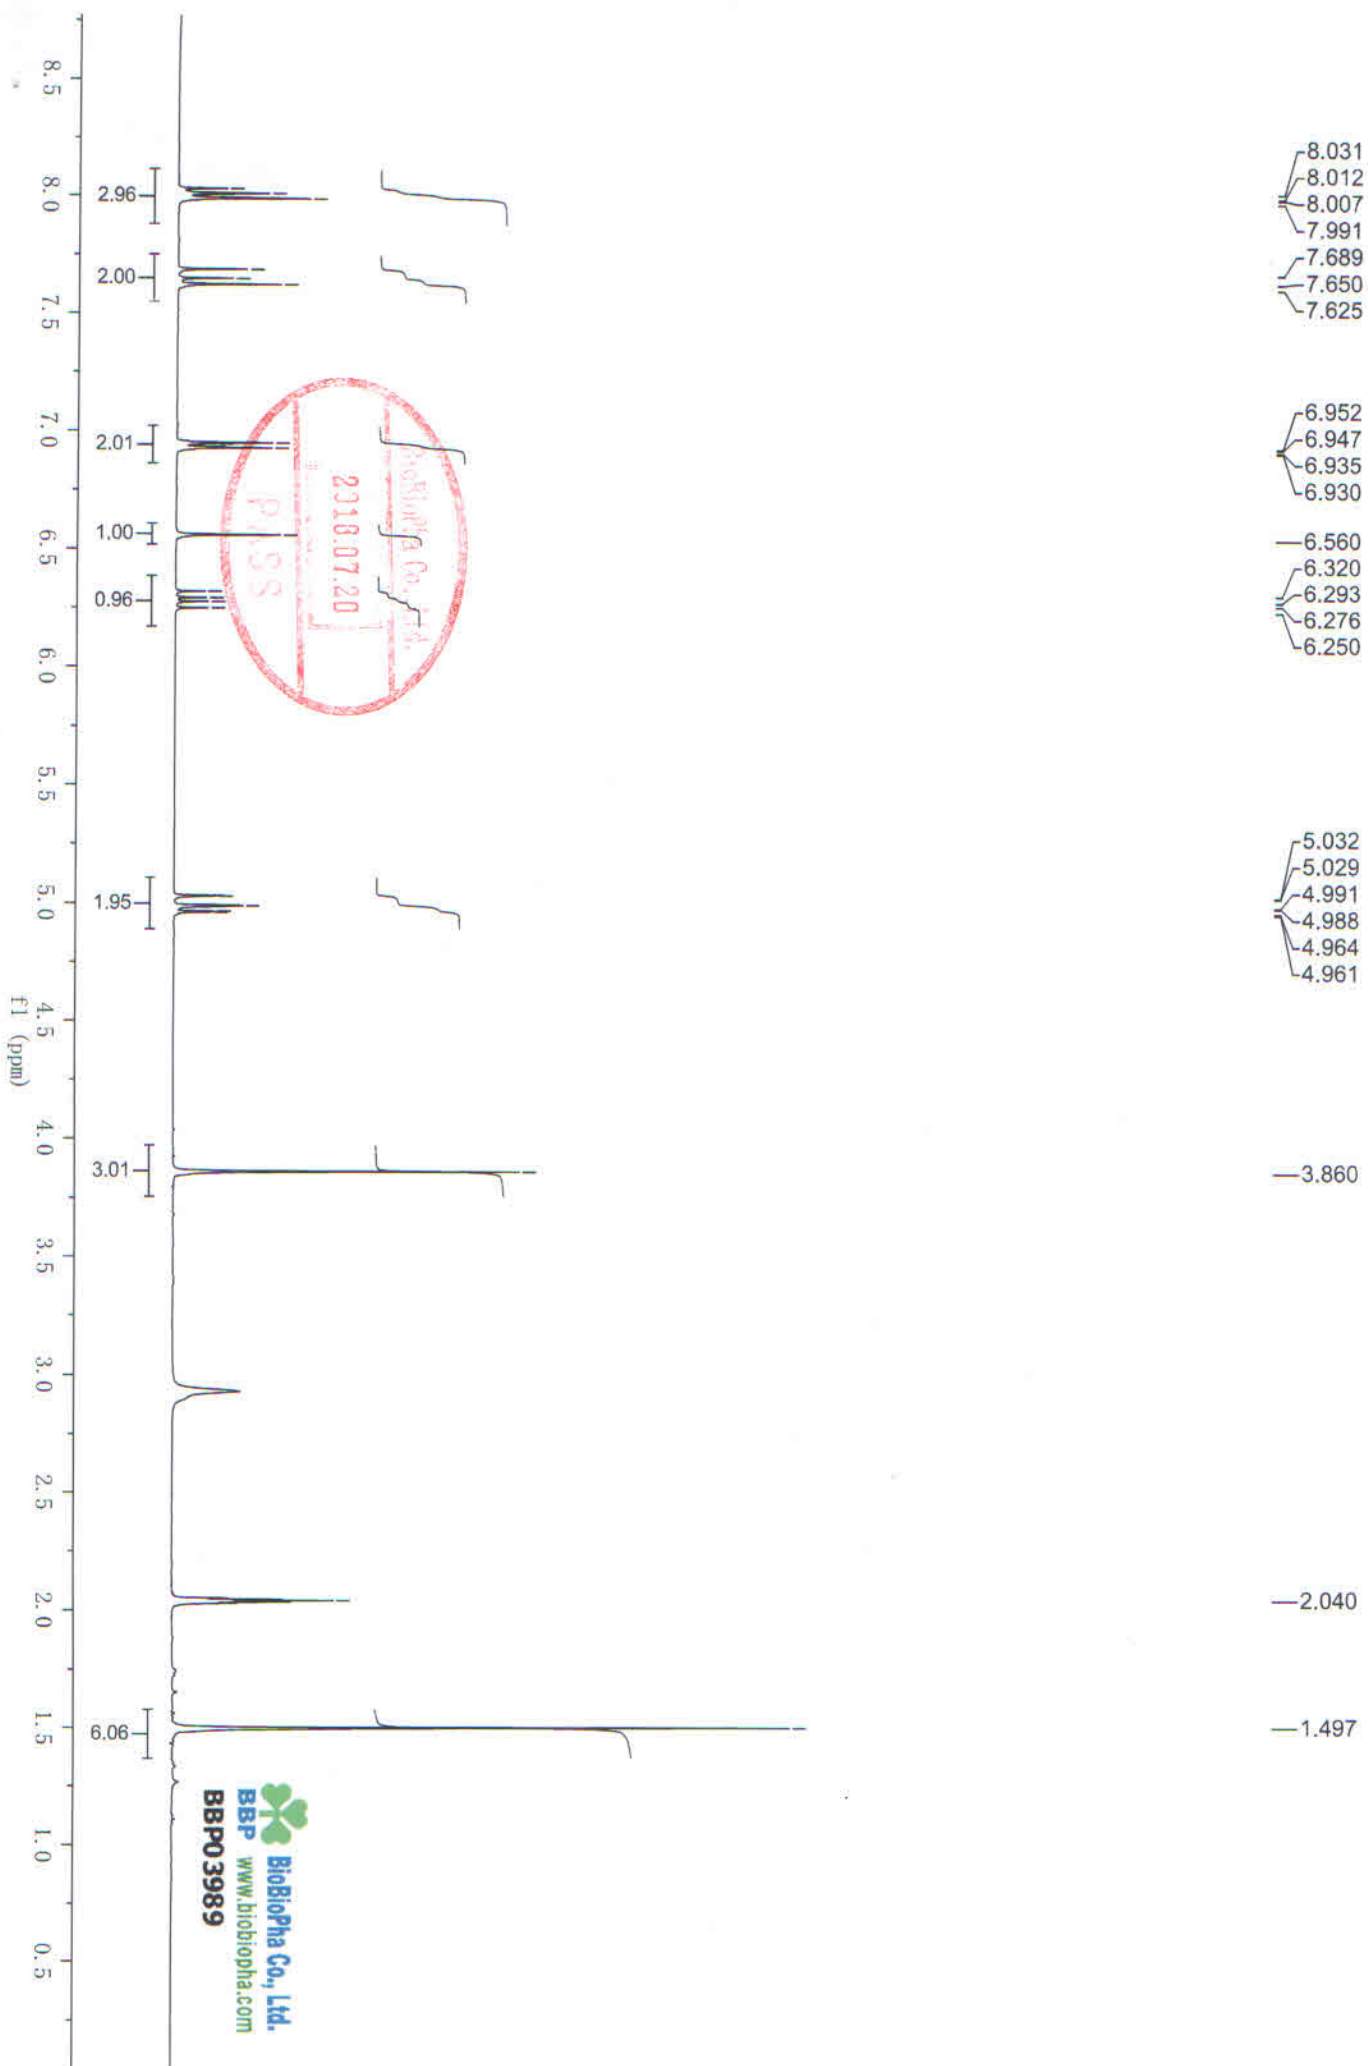

Supplement: s1 [file s1]
