# Supplementary material for: Antioxidant Mechanisms of Echinatin and Licochalcone A
Source: MDPI journal article supplement (doi:10.3390/molecules24010003), 2018-12-20
Supplement: s1 [file s1]

Suppl. 1 Some phenolics with two phenolic -OHs substitute

## Antioxidant Mechanisms of Echinatin and Licochalcone A

Minshi Liang<sup>1,2,†</sup>, Xican Li<sup>1,2,†,\*</sup>, Xiaojian Ouyang<sup>1,2</sup>, Hong Xie<sup>1,2</sup>, and Dongfeng Chen<sup>3,4,\*</sup>

<sup>1</sup> School of Chinese Herbal Medicine; Guangzhou University of Chinese Medicine, Guangzhou 510006, China. E-mails: lminshi@outlook.com (M.L.); [oyxiaojian55@163.com](mailto:oyxiaojian55@163.com) (X.O.); xiehongxh1@163.com (H.X.)

<sup>2</sup> Innovative Research & Development Laboratory of TCM; Guangzhou University of Chinese Medicine, Guangzhou 510006, China.

<sup>3</sup> School of Basic Medical Science, Guangzhou University of Chinese Medicine, Guangzhou, China, 510006

<sup>4</sup> The Research Center of Basic Integrative Medicine, Guangzhou University of Chinese Medicine, Guangzhou, China, 510006. E-mail: chen888@gzucm.edu.cn (D. C.)

\* Correspondence: [lixc@gzucm.edu.cn](mailto:lixc@gzucm.edu.cn) (X.L.); [lixican@126.com](mailto:lixican@126.com) (X.L.); chen888@gzucm.edu.cn (D. C.) Tel: +86-20-39358076; Fax: +86-20-38892690

† These authors contributed equally to this work.

| No. | Name                         | Structure                                                                           | Plant                     | Type     |
|-----|------------------------------|-------------------------------------------------------------------------------------|---------------------------|----------|
| 1   | licochalcone C               | 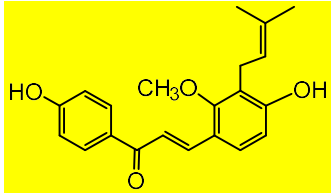 | Glycyrrhiza inflata[1]    | chalcone |
| 2   | 2'-O-methylisoliquiritigenin |  | Arachis hypogaea Linn.[2] | chalcone |

|   |             |                                                                                   |                              |                 |
|---|-------------|-----------------------------------------------------------------------------------|------------------------------|-----------------|
| 3 | loureirin A | 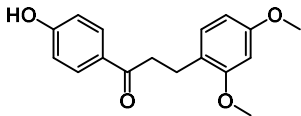 | Dracaena cochinchinensis [3] | dihydrochalcone |
|---|-------------|-----------------------------------------------------------------------------------|------------------------------|-----------------|

| No. | Name                     | Structure                                                                           | Plant                      | Type       |
|-----|--------------------------|-------------------------------------------------------------------------------------|----------------------------|------------|
| 1   | corylifol A              | 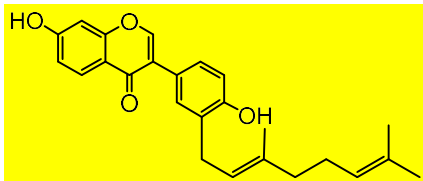  | Psoralea corylifolia L.[1] | Isoflavone |
| 2   | daidzein                 |   | Pueraria lobate [2, 3]     | Isoflavone |
| 3   | daidzin                  |  | Soybean[3, 4]              | Isoflavone |
| 4   | 7,4'-di-O-methyldaidzein |  | Sophora japonica[5]        | Isoflavone |

|   |                    |                                                                                     |                              |            |
|---|--------------------|-------------------------------------------------------------------------------------|------------------------------|------------|
| 5 | 8-prenyldaidzein   | 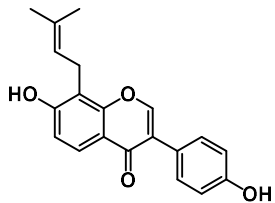  | Pueraria lobate [6]          | Isoflavone |
| 6 | 3'-methoxypuerarin |   | Puerarin lobate ( willd).[7] | Isoflavone |
| 7 | 4'-methoxypuerarin |  | Pueraria lobate [3]          | Isoflavone |
| 8 | isoformononetin    |  | Eysenhardtia polystachya[8]  | Isoflavone |

References

- [1] Xiao, G.; Li, G.; Liang, C.; Zhang, Z.; Yin, J.J.; Tao, W.; Cheng, Z.; Wei, X.; Wang, Z. Isolation of antioxidants from *Psoralea corylifolia* fruits using high-speed counter-current chromatography guided by thin layer chromatography-antioxidant autographic assay. *Journal of Chromatography A*. **2010**, 1217, 5470-5476.
- [2] Pan, W.; Liu, Q. Puerarin and daidzein were isolated from *Pueraria lobata* by the method of hydrolizing. *Natural Product Research & Development*. **2000**,
- [3] Sun, Y.G.; Wang, S.S.; Feng, J.T.; Xue, X.Y.; Liang, X.M. Two new isoflavone glycosides from *Pueraria lobata*. *Journal of Asian Natural Products Research*. **2008**, 10, 719-723.
- [4] Ohta, N.; Kuwata, G.; Akahori, H.; Watanabe, T. Isoflavonoid Constituents of Soybeans and Isolation of a New Acetyl Daidzin. *Journal of the Agricultural Chemical Society of Japan*. **1979**, 43, 1415-1419.
- [5] Yu-Ping, T.; Jie, H.; Jing-Hua, W.; Feng-Chang, L. A new coumaronochromone from *Sophora japonica*. *Journal of Asian Natural Products Research*. **2002**, 4, 1-5.
- [6] Hakamatsuka, T.; Ebizuka, Y.; Sankawa, U. Induced isoflavonoids from copper chloride-treated stems of *Pueraria lobata*. *Phytochemistry*. **1991**, 30, 1481-1482.
- [7] Ye, J.; Zhou, X.; Chen, Z.; Ye, W. 2D NMR study on solution structure of natural product 3<sup>^</sup>-methoxy puerarin. *Journal of Xiamen University*. **2003**, 42,
- [8] R., M.P.G.; R., V.S.; S., P.G.; M., Z.S.C.P.G. Antiuroliithatic activity of 7-hydroxy-2',4',5'-trimethoxyisoflavone and 7-hydroxy-4'-methoxyisoflavone from *Eysenhardtia Polystachya*. *Journal of Herbs Spices & Medicinal Plants*. **2000**, 7, 27-34.
