# Supplementary material for: Antioxidant Mechanisms of Echinatin and Licochalcone A
Source: MDPI journal article supplement (doi:10.3390/molecules24010003), 2018-12-20
Supplement: s1 [file s1]

### Suppl. 3 Dose–response curves

## Antioxidant Mechanisms of Echinatin and Licochalcone A

Minshi Liang<sup>1,2,†</sup>, Xican Li<sup>1,2,†,\*</sup>, Xiaojian Ouyang<sup>1,2</sup>, Hong Xie<sup>1,2</sup>, and Dongfeng Chen<sup>3,4,\*</sup>

<sup>1</sup> School of Chinese Herbal Medicine; Guangzhou University of Chinese Medicine, Guangzhou 510006, China. E-mails: lminshi@outlook.com (M.L.); [oyxiaojian55@163.com](mailto:oyxiaojian55@163.com) (X.O.); xiehongxh1@163.com (H.X.)

<sup>2</sup> Innovative Research & Development Laboratory of TCM; Guangzhou University of Chinese Medicine, Guangzhou 510006, China.

<sup>3</sup> School of Basic Medical Science, Guangzhou University of Chinese Medicine, Guangzhou, China, 510006

<sup>4</sup> The Research Center of Basic Integrative Medicine, Guangzhou University of Chinese Medicine, Guangzhou, China, 510006. E-mail: chen888@gzucm.edu.cn (D. C.)

\* Correspondence: [lixc@gzucm.edu.cn](mailto:lixc@gzucm.edu.cn) (X.L.); [lixican@126.com](mailto:lixican@126.com) (X.L.); chen888@gzucm.edu.cn (D. C.) Tel: +86-20-39358076; Fax: +86-20-38892690

† These authors contributed equally to this work.

**Note:** This Supporting information provides the original data of **Table 1** in the main text. All data underline are mentioned in Table 1 in the main text.

## 1. $Fe^{3+}$ -reducing power assay

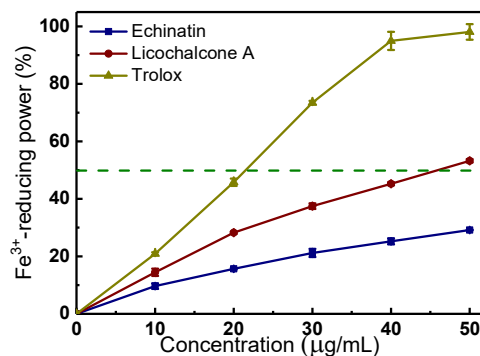

Figure S1: The dose response curves of echinatin and licochalcone A in  $Fe^{3+}$ -reducing power assay. Each value is expressed as mean  $\pm$  SD (n = 3).

Tab. S1 The comparison of  $IC_{50}$  values of echinatin and licochalcone A and positive control in  $Fe^{3+}$ -reducing power assay.

|                 | Mean $\pm$ SD<br>$\mu\text{g/mL}$ | Mean $\pm$ SD<br>$\mu\text{M}$               |
|-----------------|-----------------------------------|----------------------------------------------|
| echinatin       | 91.3 $\pm$ 2.3                    | <u>338.0<math>\pm</math>8.6</u> <sup>c</sup> |
| licochoalcone A | 45.1 $\pm$ 0.3                    | <u>133.2<math>\pm</math>0.9</u> <sup>b</sup> |
| Trolox          | 21.9 $\pm$ 0.9                    | <u>87.5<math>\pm</math>3.4</u> <sup>a</sup>  |

$IC_{50}$  value was defined as the concentration of 50% superoxide anion radical inhibition and calculated by linear regression which was analyzed by Origin 2017 professional software. Means values with different superscripts in the same column are significantly different ( $p < 0.05$ ).

## 2. $Cu^{2+}$ -reducing power assay

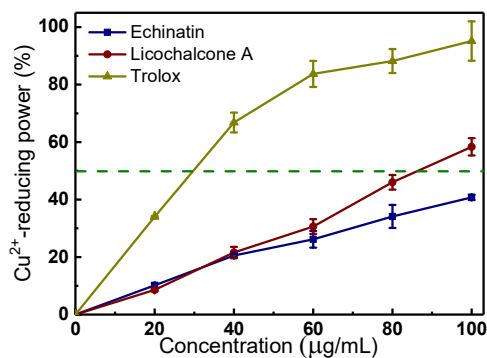

Figure S2: The dose response curves of echinatin and licochalcone A in  $Cu^{2+}$ -reducing power assay. Each value is expressed as mean  $\pm$  SD (n = 3).

Tab. S2 The comparison of  $IC_{50}$  values of echinatin and licochalcone A and positive control in  $Cu^{2+}$ -reducing power assay.

|                 | Mean $\pm$ SD<br>$\mu\text{g/mL}$ | Mean $\pm$ SD<br>$\mu\text{M}$                |
|-----------------|-----------------------------------|-----------------------------------------------|
| echinatin       | 66.0 $\pm$ 2.9                    | <u>228.1<math>\pm</math>10.6</u> <sup>c</sup> |
| licochoalcone A | 43.7 $\pm$ 0.7                    | <u>129.1<math>\pm</math>2.1</u> <sup>b</sup>  |
| Trolox          | 16.9 $\pm$ 0.2                    | <u>67.5<math>\pm</math>0.9</u> <sup>a</sup>   |

$IC_{50}$  value was defined as the concentration of 50% superoxide anion radical inhibition and calculated by linear regression which was analyzed by Origin 2017 professional software. Means values with different superscripts in the same column are significantly different ( $p < 0.05$ ).

### 3. PTIO•-scavenging assay

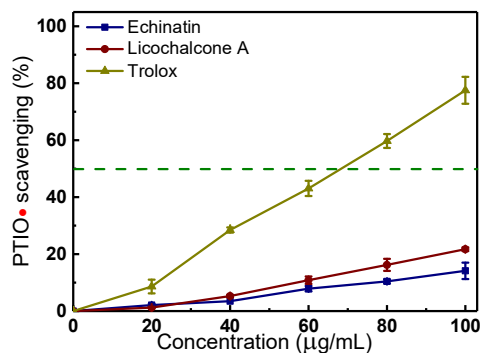

Figure S3: The dose response curves of echinatin and licochalcone A in PTIO•-scavenging assay. Each value is expressed as mean  $\pm$  SD (n = 3).

Tab. S3 The comparison of IC<sub>50</sub> values of echinatin and licochalcone A and positive control in PTIO•-scavenging assay.

|                | Mean $\pm$ SD<br>$\mu$ g/mL | Mean $\pm$ SD<br>$\mu$ M        |
|----------------|-----------------------------|---------------------------------|
| echinatin      | 345.0 $\pm$ 40.5            | 1276.5 $\pm$ 149.9 <sup>c</sup> |
| licochalcone A | 208.9 $\pm$ 7.8             | 617.4 $\pm$ 22.9 <sup>b</sup>   |
| Trolox         | 67.8 $\pm$ 2.7              | 270.9 $\pm$ 10.8 <sup>a</sup>   |

IC<sub>50</sub> value was defined as the concentration of 50% superoxide anion radical inhibition and calculated by linear regression which was analyzed by Origin 2017 professional software. Means values with different superscripts in the same column are significantly different (p<0.05).

### 4. DPPH•-scavenging assay

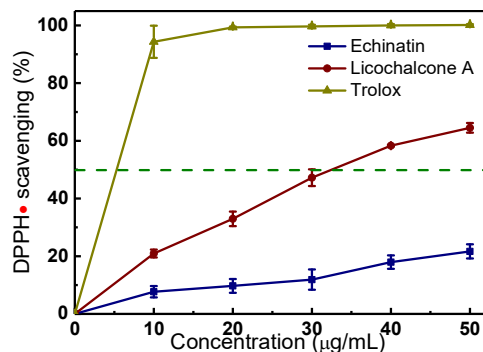

Figure S4: The dose response curves of echinatin and licochalcone A in DPPH•-scavenging assay. Each value is expressed as mean  $\pm$  SD (n = 3).

Tab. S4 The comparison of IC<sub>50</sub> values of echinatin and licochalcone A and positive control in DPPH•-scavenging assay.

|                | Mean $\pm$ SD<br>$\mu$ g/mL | Mean $\pm$ SD<br>$\mu$ M      |
|----------------|-----------------------------|-------------------------------|
| echinatin      | 106.6 $\pm$ 18.2            | 394.2 $\pm$ 67.5 <sup>c</sup> |
| licochalcone A | 34.6 $\pm$ 1.2              | 102.3 $\pm$ 3.6 <sup>b</sup>  |
| Trolox         | 12.0 $\pm$ 0.6              | 47.8 $\pm$ 2.6 <sup>a</sup>   |

IC<sub>50</sub> value was defined as the concentration of 50% superoxide anion radical inhibition and calculated by linear regression which was analyzed by Origin 2017 professional software. Means values with different superscripts in the same column are significantly different (p<0.05).
