# Supplementary material for: Antioxidant Mechanisms of Echinatin and Licochalcone A
Source: MDPI journal article supplement (doi:10.3390/molecules24010003), 2018-12-20
Supplement: s1 [file s1]

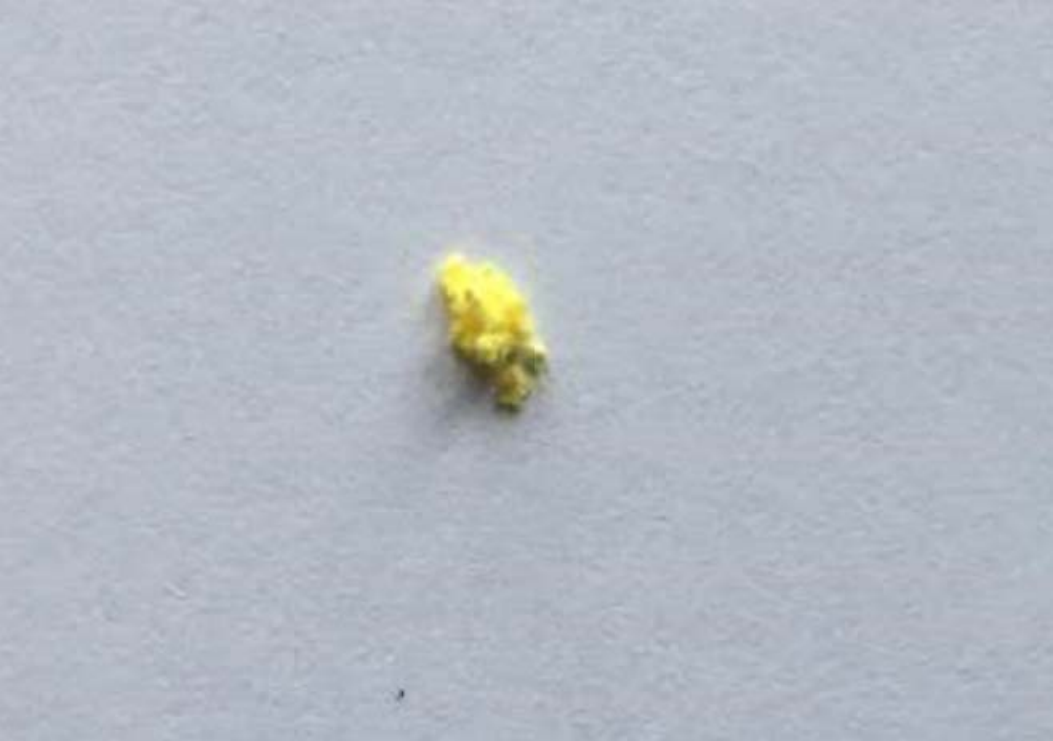

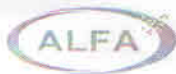

## 产品分析证书

Certificate of Analysis

## 产品信息

|        |                                                |                                                                                    |
|--------|------------------------------------------------|------------------------------------------------------------------------------------|
| 中文名称   | 刺甘草查尔酮                                         | 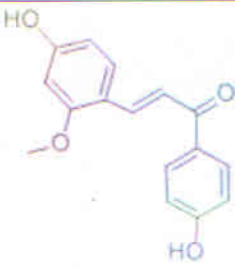 |
| 英文名称   | Echinatin                                      |                                                                                    |
| CAS 号码 | 34221-41-5                                     |                                                                                    |
| 分子式    | C <sub>16</sub> H <sub>14</sub> O <sub>4</sub> |                                                                                    |
| 分子量    | 270.284                                        |                                                                                    |
| 批号     | AF8041723                                      |                                                                                    |

## 分析结果

| 检测项目 | 质量标准              | 结果      |
|------|-------------------|---------|
| 性状   | 黄色粉末。             | 符合。     |
| 液相色谱 | ≥98.0% (面积归一化法)。  | 99.70%。 |
| 质谱   | 应符合其结构。           | 符合。     |
| 核磁   | 应符合其结构。           | 符合。     |
| 结论   | 产品质量符合报告标准, 准予出厂。 |         |

## 注意事项

|      |                                       |
|------|---------------------------------------|
| 贮存方法 | 密闭、干燥、置于 2-8℃ 避光保存。                   |
| 使用方法 | 即配即用, 仅限用于实验室使用, 不得用于人体。              |
| 提示   | 如遇质量问题, 请于收到产品之日起 15 日内与我们联系, 感谢你的选购。 |

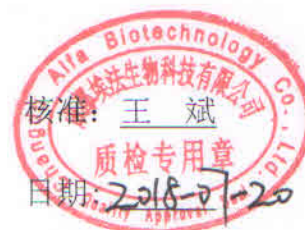

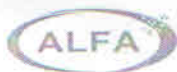

HPLC 图谱

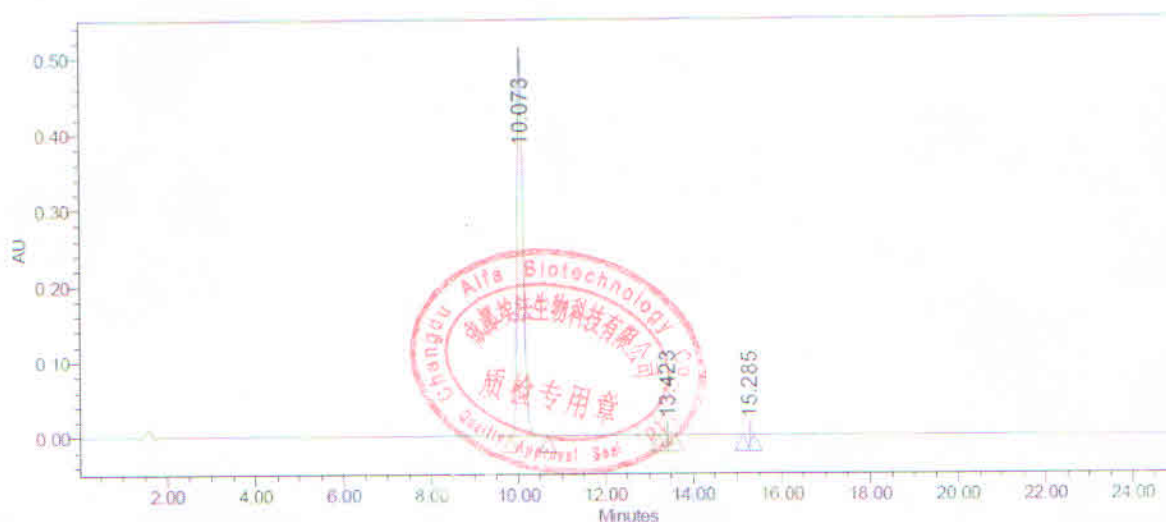

Peak Results

| Name | RT     | Area    | % Area | USP Plate Count | USP Resolution |
|------|--------|---------|--------|-----------------|----------------|
| 1    | 10.073 | 4715662 | 99.70  | 26184.98        |                |
| 2    | 13.423 | 11953   | 0.25   | 42793.92        | 12.7%          |
| 3    | 15.285 | 2211    | 0.05   | 82963.44        | 7.52           |
